# Supplementary material
Source: publisher figshare collection journal article supplement (https://springernature.figshare.com/ndownloader/files/20990142)
Supplement: Supplementary file [file 20990142]

**Point Prevalence Survey of Antimicrobial Use and Healthcare-Associated Infections in Belgian Acute Care Hospitals: Results of the Global-PPS and ECDC-PPS 2017**

ADDITIONAL FILE 2

**Table S2: Overview of antibiotic (J01) prescriptions by antibiotic subclass (ATC level 4) and by indication, total results for Global and ECDC-PPS 2017 (Belgium, acute care hospitals)**

| ATC-code (level 4) | Name                                                         | Number of prescriptions (% J01) |              |             |            |             |             |
|--------------------|--------------------------------------------------------------|---------------------------------|--------------|-------------|------------|-------------|-------------|
|                    |                                                              | Total                           | CAI          | HAI         | LAI        | MP          | SP          |
| <b>J01</b>         | <b>Antibacterials for systemic use</b>                       | <b>8448</b>                     | <b>4511</b>  | <b>2057</b> | <b>229</b> | <b>396</b>  | <b>1033</b> |
| J01AA              | Tetracyclines                                                | 55 (0.7%)                       | 30 (0.7%)    | 19 (0.9%)   | 2 (0.9%)   | 1 (0.3%)    | 0           |
| J01BA              | Amphenicols                                                  | 3 (0.04%)                       | 1 (0.02%)    | 0           | 0          | 0           | 0           |
| J01CA              | Penicillins with extended spectrum                           | 562 (6.7%)                      | 382 (8.5%)   | 111 (5.4%)  | 19 (8.3%)  | 32 (8.1%)   | 6 (0.6%)    |
| J01CE              | Beta-lactamase sensitive penicillins                         | 49 (0.6%)                       | 33 (0.7%)    | 4 (0.2%)    | 0          | 11 (2.8%)   | 1 (1.0%)    |
| J01CF              | Beta-lactamase resistant penicillins                         | 233 (2.8%)                      | 133 (2.9%)   | 89 (4.3%)   | 1 (0.4%)   | 1 (0.3%)    | 4 (0.4%)    |
| J01CG              | Beta-lactamase inhibitors                                    | 7 (0.08%)                       | 4 (0.9%)     | 3 (0.1%)    | 0          | 0           | 0           |
| J01CR              | Combinations of penicillins, incl. beta-lactamase inhibitors | 2724 (32.3%)                    | 1814 (40.2%) | 619 (30.1%) | 91 (39.7%) | 49 (12.4%)  | 91 (8.8%)   |
| J01DB              | First-generation cephalosporins                              | 737 (8.7%)                      | 13 (0.3%)    | 4 (0.2%)    | 1 (0.4%)   | 3 (0.8%)    | 715 (69.2%) |
| J01DC              | Second-generation cephalosporins                             | 347 (4.1%)                      | 193 (4.3%)   | 82 (4.0%)   | 13 (5.7%)  | 5 (1.3%)    | 48 (4.6%)   |
| J01DD              | Third-generation cephalosporins                              | 554 (6.6%)                      | 359 (8.0%)   | 153 (7.4%)  | 24 (10.5%) | 6 (1.5%)    | 4 (0.4%)    |
| J01DE              | Fourth-generation cephalosporins                             | 101 (1.2%)                      | 44 (1.0%)    | 53 (2.6%)   | 2 (0.9%)   | 2 (0.5%)    | 0           |
| J01DF              | Monobactams                                                  | 12 (0.1%)                       | 3 (0.07%)    | 5 (0.3%)    | 1 (0.4%)   | 0           | 2 (0.2%)    |
| J01DH              | Carbapenems                                                  | 323 (3.8%)                      | 112 (2.5%)   | 193 (9.4%)  | 13 (5.7%)  | 1 (0.3%)    | 1 (0.1%)    |
| J01EA              | Trimethoprim and derivates                                   | 8 (0.09%)                       | 2 (0.04%)    | 1 (0.05%)   | 1 (0.4%)   | 4 (1.0%)    | 0           |
| J01EB              | Short-acting sulfonamides                                    | 1 (0.01%)                       | 0            | 1 (0.05%)   | 0          | 0           | 0           |
| J01EC              | Intermediate-acting sulfonamides                             | 8 (0.09%)                       | 1 (0.02%)    | 4 (0.2%)    | 1 (0.4%)   | 2 (0.5%)    | 0           |
| J01EE              | Combinations of sulfonamides and trimethoprim                | 265 (3.1%)                      | 72 (1.6%)    | 57 (2.8%)   | 2 (0.9%)   | 109 (27.5%) | 9 (0.9%)    |
| J01FA              | Macrolides                                                   | 306 (3.6%)                      | 147 (3.3%)   | 21 (1.0%)   | 6 (2.6%)   | 77 (19.4%)  | 1 (0.1%)    |
| J01FF              | Lincosamides                                                 | 237 (2.8%)                      | 158 (3.5%)   | 36 (1.8%)   | 4 (1.7%)   | 4 (1.0%)    | 34 (3.3%)   |
| J01GB              | Aminoglycosides                                              | 123 (1.5%)                      | 70 (1.6%)    | 40 (1.9%)   | 3 (1.1%)   | 6 (1.5%)    | 1 (0.1%)    |
| J01MA              | Fluoroquinolones                                             | 1131 (13.4%)                    | 658 (14.6%)  | 315 (15.3%) | 37 (16.2%) | 36 (9.1%)   | 61 (5.9%)   |
| J01MB              | Other quinolones                                             | 1 (0.01%)                       | 0            | 1 (0.05%)   | 0          | 0           | 0           |
| J01RA              | Combinations of antibacterials                               | 23 (0.3%)                       | 15 (0.3%)    | 3 (0.1%)    | 0          | 3 (0.8%)    | 0           |
| J01XA              | Glycopeptide antibacterials                                  | 239 (2.8%)                      | 83 (1.8%)    | 145 (7.0%)  | 4 (1.7%)   | 0           | 3 (0.3%)    |
| J01XB              | Polymyxins                                                   | 15 (0.2%)                       | 7 (0.2%)     | 7 (0.3%)    | 0          | 1 (0.3%)    | 0           |
| J01XD              | Imidazole derivatives                                        | 202 (2.4%)                      | 112 (2.5%)   | 42 (2.0%)   | 0          | 2 (0.5%)    | 38 (3.7%)   |
| J01XE              | Nitrofurantoin derivatives                                   | 131 (1.6%)                      | 49 (1.1%)    | 26 (1.3%)   | 4 (1.7%)   | 31 (7.8%)   | 0           |
| J01XX              | Other antibacterials                                         | 51 (0.6%)                       | 16 (0.4%)    | 23 (1.1%)   | 0          | 10 (2.5%)   | 14 (1.4%)   |

ATC= Anatomical Therapeutic Chemical classification system, CAI = community-acquired infections, ECDC = European Centre for Disease Prevention and Control, HAI = healthcare-associated infections, LAI = Infection present on admission from long-term care facility or Nursing Home, MP = medical prophylaxis, SP = surgical prophylaxis
